# Supplementary material for: Formation of parallel aligned nano-fibrils of a donor–acceptor conjugated copolymer via controlling J-aggregates and post treatment
Source: Royal Society of Chemistry journal article supplement (doi:10.1039/c3sm51986d), 2013-01-01
Supplement: c3sm51986d.pdf [file c3sm51986d.pdf]

1  
2  
3  
4  
5  
6  
7  
8  
9  
10  
11  
12  
13  
14  
15

## Supporting Information

for

### **Formation of Parallel Aligned Nano-fibrils of Donor-Acceptor Conjugated Copolymer via Controlling J-aggregates and Post Treatment**

*Yaozhuo Xu, Jiangang Liu, Haiyang Wang, Xinhong Yu, Rubo Xing and Yanchun  
Han\**

State Key Laboratory of Polymer Physics and Chemistry, Changchun Institute of  
Applied Chemistry, Chinese Academy of Sciences, 5625 Renmin Street, Changchun  
130022, P. R. China; University of the Chinese Academy of Sciences, No.19A  
Yuquan Road, Beijing 100049, China.

Tel: 86-431-85262175, Fax: 86-431-85262126, Email: [ychan@ciac.ac.cn](mailto:ychan@ciac.ac.cn)

1 The theoretical thickness of the crystals was estimated by the Scherrer equation. The  
2 Scherrer equation can be written as:

$$3 \quad D = K\lambda / B\cos\theta \quad (1)$$

4 D is the average thickness of grains, which was perpendicular to the crystal plane  
5 direction. K is a dimensionless shape factor with the value of 0.89.  $\lambda$  is the X-ray  
6 wavelength. B is the line broadening at half the maximum intensity (FWHM). It could  
7 be measured in the XRD profile of PDQT film in figure S1.  $\theta$  is the Bragg angle. The  
8 theoretical thickness D was about 41 nm, which was in accordance with the measured  
9 thickness of films.

## 10 **Figure Captions**

### 11 **Figure S1**

12 Out-plane GIXRD profile of PDQT film. The samples were cast from CF solution  
13 with the concentration of 0.1 mg/mL

### 14 **Figure S2**

15 Thermal treatment of the PDQT films at 200 °C. The samples were cast from CF  
16 solution with the same concentration of 0.1 mg/mL. The samples were heated to  
17 corresponding temperature and kept for 20 min in nitrogen, and then cooled to the  
18 room temperature at the rate of 10°C/min. The scale bar represents 5  $\mu$ m.

19

1 **Figure S1**

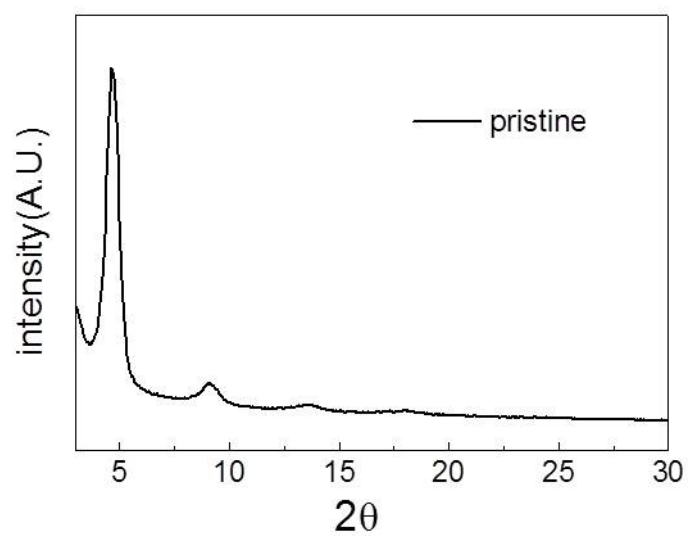

2

3 **Figure S2**

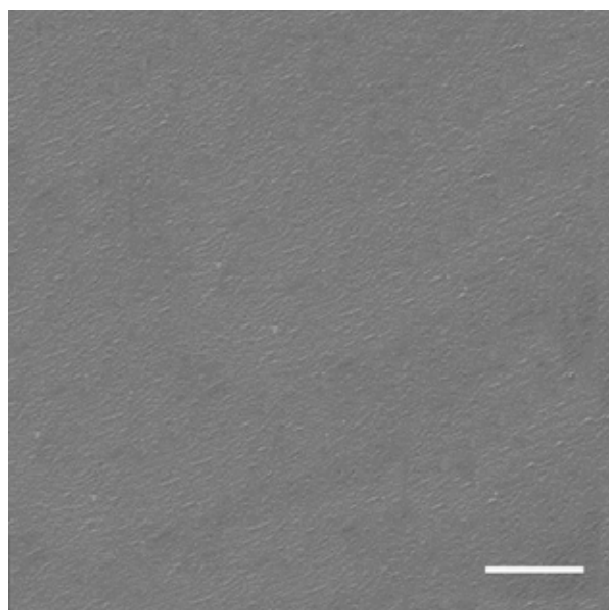

4
